# Supplementary material
Source: PubMed Central journal article supplement (PMC6237485)
Supplement: jciinsight-3-122857-s200.pdf [file jciinsight-3-122857-s200.pdf]

**Supplementary Materials**

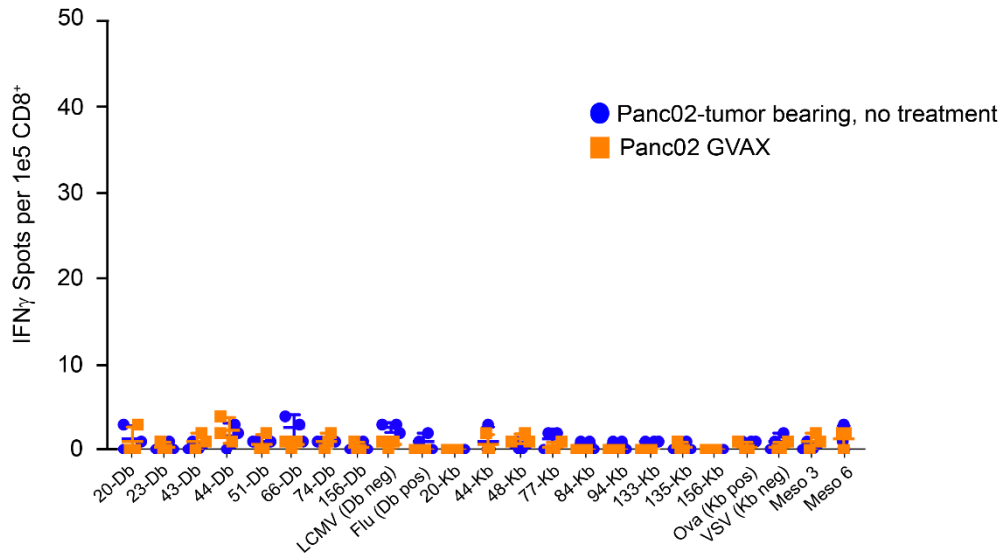

**Figure S1: Responses to Immunogenic Peptides are Not Naturally Primed by Tumor or By Autologous GVAX.** Mice were inoculated with  $1 \times 10^6$  Panc02 tumor cells on day 0. Vaccinated mice received three doses of GVAX administered in three limbs on days 10, 17 and 25, while Panc02 tumor-bearing mice received no treatment. Spleens were harvested on day 39. Peptide identifier is shown with the T2 antigen presenting cell (APC) MHC restriction. Symbols represent each replicate with a line at the mean  $\pm$  SEM.

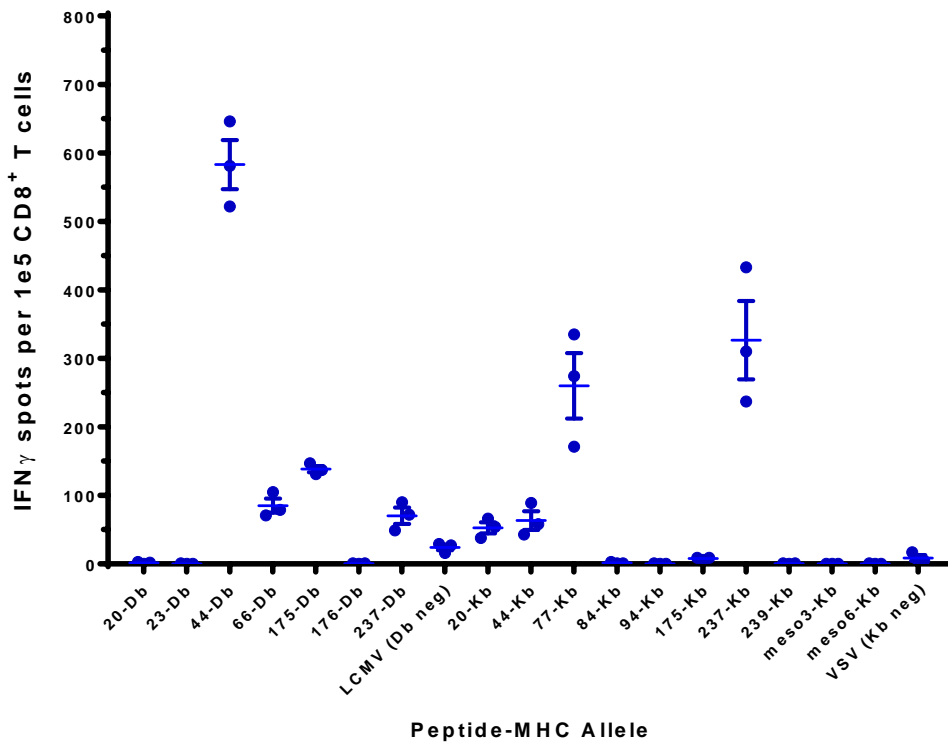

**Figure S2:** Naïve mice were vaccinated on days 0 and 7 with neoantigen-targeted SLP vaccine. Splenocytes were harvested on day 14 for ELISPOT assay as per “Methods” section.

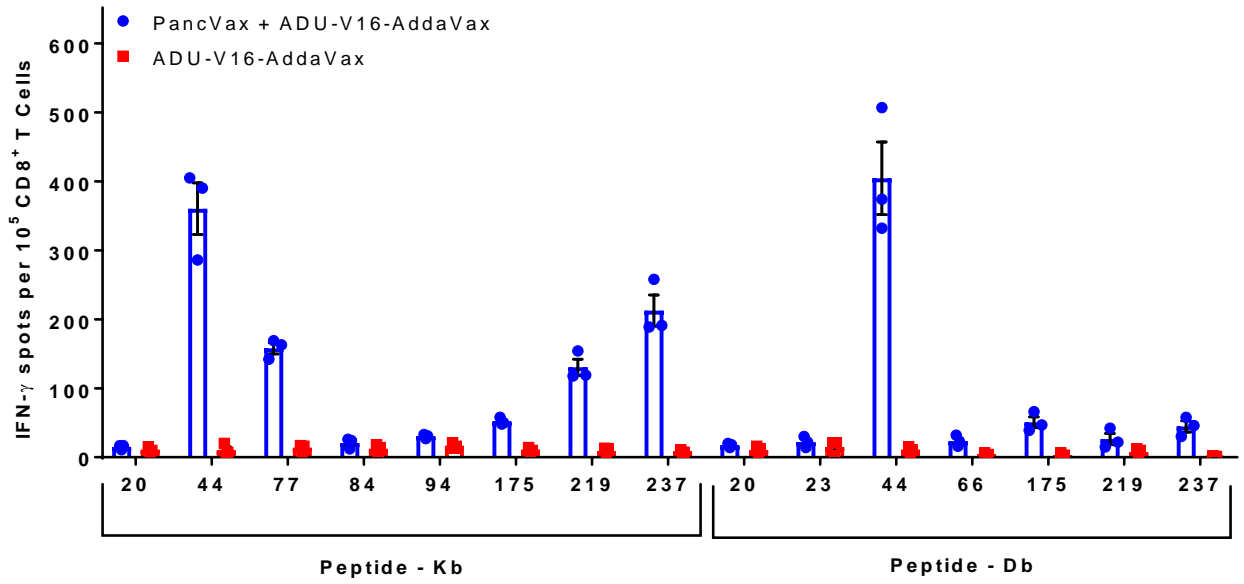

**Figure S3:** Naïve mice (n=3) were vaccinated with either PancVax + ADU-V16-AddaVax or ADU-V16-AddaVax alone on days 0 and 7. ELISPOT assay was performed on day 14. Symbols represent each biological replicate with a line at the mean  $\pm$  SEM.

**Table S1: Complete List of All Screened Peptides.** Gene names and mutations are noted.

| Peptide Identifier | Gene Name     | 20-mer Peptide Sequence | Mutation |
|--------------------|---------------|-------------------------|----------|
| 1                  | Olf1136       | LIRMDPQLHIAMYFFLSHLS    | P58A     |
| 2                  | Olf1217       | FANSGAICIILFLLLLVSYG    | I209L    |
| 3                  | Olf1247       | SLKTHSQEGRCKALSTCSSH    | R232C    |
| 4                  | Olf1278       | TEMVLLVAMALDRYVAICKP    | W120L    |
| 5                  | Gatm          | ISTIKVNIRNGNSLGGGFHC    | A398G    |
| 6                  | 4833422F24Rik | LFLGLLGGESVWYLHRYLTD    | A241V    |
| 7                  | Fat4          | RRLPLPSPSLWQLLRVWGLL    | C22W     |
| 8                  | Chrb2         | VSYDGSIFWLLPAIYKSACK    | P147L    |
| 9                  | Hsd3b3        | SNTIIKALKKNNFILRGGGKS   | K154N    |
| 10                 | Ptgr1         | EYVTEGFEEKMAAAFMGMLKG   | P310A    |
| 11                 | Slc5a9        | WRRVCNINAITLLAINIFLW    | I672T    |
| 12                 | Niacr1        | NCDIYSSVDLPFFTTLSFTY    | A272P    |
| 13                 | Emid2         | CRWPGPCANLMSYRTLIRPT    | V93M     |
| 14                 | Olf1549       | CADIRVNVWYVLSVLLSTVV    | G201V    |
| 15                 | Odz3          | SLVTGDYLYNVSYSNDNDVT    | F1561V   |
| 16                 | Fam92b        | EARPLTDTNPPPSVPWPLAS    | A241P    |
| 17                 | Bcl2a1d       | TCLQTSFQFWTRIHNE        | G123T    |
| 18                 | Olf1770       | TTLFCVVLSYAYIIKTILKF    | V215A    |
| 19                 | Olf1806       | LITEFYLLAALSVDRYVAIC    | M116L    |
| 20                 | Myo1g         | LQGDVAFGHSNLFIRSPRTL    | K696N    |
| 21                 | Kcnj12        | MVEATAMTTQPRSSYLANEI    | A312P    |
| 22                 | Cacnb1        | LTSLRRNLSFCGGLEASPRG    | W503C    |
| 23                 | Ace           | ALEKIAFLPFAYLVDQWRWG    | G473A    |
| 24                 | Stab1         | IHKANYIAANRVFHTVTALR    | G486R    |
| 25                 | Pfkm          | MNNWEVYKLLSHVRPPVSKG    | A389S    |
| 26                 | Olf121        | SLSVKRFAFATFSEVPGECF    | K22T     |
| 27                 | Gpr111        | PVLHHNGCVATTFVHFFYL     | A456T    |
| 28                 | Arhgap28      | AVMLKAFFREMPTSLFPVEY    | L470M    |
| 29                 | Fhod3         | EKEDKLSERVTGLWSTSLQ     | A809V    |
| 30                 | Slc6a7        | GSQSPKPLMVNMRKYGGITS    | H607N    |
| 31                 | Supv311       | YTTGEEVEVQTYERLTPISV    | K344T    |
| 32                 | Dnahc9        | PAVKQSISKFIAFVHISVNK    | M3013I   |
| 33                 | Daam2         | LRQHENAILDTHLDFEMVR     | K326T    |
| 34                 | Vps39         | KANSPLKGHEWTVQYLQHLG    | R538W    |
| 35                 | Musk          | WAYGVVLWEIVSYGLQPYYG    | F797V    |

|    |               |                       |        |
|----|---------------|-----------------------|--------|
| 36 | Rimbp2        | VHLCVARYSYTPFDGNENP   | N200T  |
| 37 | Mug1          | QASSVEVEMNIYVVLARLTA  | R1187I |
| 38 | Abcc9         | DATVTEGGENISVGQRQLFC  | F1446I |
| 39 | Supt5h        | VVTVRHQAVTLKKDNRFAVA  | Q575L  |
| 40 | Zfp940        | VNQGIVFNNHKRLNAGEKAT  | Q159K  |
| 41 | Slc17a6       | GYIASRLAANPVFGAAILLT  | R153P  |
| 42 | Smg1          | GENTYGRKSLVQELRINNV   | G103V  |
| 43 | Ankrd11       | YAEYVTYTGSVLLDGKPLSK  | L2456V |
| 44 | Glb1l2        | GSSAEESHLSCLNWSTLVPL  | G36C   |
| 45 | Slc6a20a      | LLIVLVETIANCYVYGLKRF  | K430N  |
| 46 | Muc6          | IFTATCGDDVAATFSIQLRR  | P80A   |
| 47 | A330008L17Rik | SPVRWISKPGFFFFLLQV    | C81F   |
| 48 | Gm10717       | TFFSDFVIFQTFKWMFLIFL  | K213T  |
| 49 | Gucy2d        | SVLSVVFWSVRLWADSLSLL  | L53R   |
| 50 | Gm10647       | FCLFCFVVFVFSQAPSDYHRV | G88S   |
| 51 | Gm10715       | RSYSVHFSFFKFFSDFVIFQ  | T200K  |
| 52 | Gm10719       | DFVIFQVVKWMFLIFLDFQF  | K214M  |
| 53 | Zfp955b       | EDVAVNFSLGHWALLDSYQK  | P23H   |
| 54 | Gm14403       | LDPSQKSLYKDVMLETHRNL  | G31D   |
| 55 | Gm11168       | VCISHFSRFSLISSFFKSSS  | V67L   |
| 56 | Gm904         | TIGFMCGVGLLFLIPFLKE   | F38L   |
| 57 | Heph1l        | MHAVNGYMYGIQPGLSMCKK  | S630I  |
| 58 | Col6a5        | SDALHNEFQLCTFKNRNPML  | G85C   |
| 59 | Irg1          | EHEARHSFQYMACASLLDGS  | V338M  |
| 60 | Ttc18         | ASEMHFIFLRSGHIYLEEKE  | N982S  |
| 61 | Btnl4         | FSFHEASFSGSLFPYFRLKS  | T490S  |
| 62 | Zfp423        | KKAEFIKGSHMCNVCSTFF   | K939M  |
| 63 | Gpr125        | SGNLFTSLSQATFDYLGSLR  | G160A  |
| 64 | Kcnq3         | YDALERPRGWLLYHALVFL   | R120W  |
| 65 | Olf151        | TAFMYLKPSTISSLAQENVA  | L264I  |
| 66 | Map2k5        | MLWLALGPFCEGMENQVLVIR | A11G   |
| 67 | Ros1          | EITQVFSNISRTMLNVPELQ  | G627R  |
| 68 | Olf1984       | FRTFPMKAVCVLYTMVTPM   | S272C  |
| 69 | Gtf2ird2      | YEQMLQDEAAMVVRGLPEGL  | V140M  |
| 70 | Olf1356       | PFIYSLRNKDTQKALGKLLR  | M297T  |
| 71 | Cts3          | SAVASLGPISFVIDAWHESF  | V244F  |
| 72 | Vmn1r235      | KTILLQLSTFILCYIISCLF  | M264I  |
| 73 | Scn9a         | CKLSDFAAALTPPLLIKPN   | A1797T |
| 74 | Ampd1         | QRFDKFNKYSVPGASELRD   | N378S  |
| 75 | Zfp541        | KMIQTKSVAQWVEYYYIWKK  | C1209W |
| 76 | Tpcn2         | ITLWNVMVVNTWQVILEAYK  | N637T  |

|     |               |                       |        |
|-----|---------------|-----------------------|--------|
| 77  | Rasa3         | TERIYSLFNLSMGKLEKMQE  | T203S  |
| 78  | Lactb         | LGLALGAKLVFGLRGAVPIQ  | V58F   |
| 80  | Fam75d3       | YQGLTKAYAVTPGDHLSPPS  | A221T  |
| 81  | Utp20         | LTNVFAVLSAENLSEATASI  | K1243E |
| 82  | Cant1         | TGSRAQEENTLFSYLKKGYL  | W127L  |
| 83  | Cblb          | YELYCEMGSTLQLCKICAEN  | F370L  |
| 84  | Clcn7         | ALGLRHLVVVGNHNQVVGLV  | D771G  |
| 85  | Cnppd1        | NDEWGAAGGVTVATLNALER  | A155T  |
| 86  | Fbf1          | FSSSLNTLSSLVEASHLTTS  | R798L  |
| 87  | Gkap1         | VLSSVLTTASPFALLQVDSG  | R15P   |
| 88  | Irf7          | YTETLLQHVSPGLQLELRGP  | T277P  |
| 89  | Jak1          | YDPNQRPFRRDIMRDINKLE  | A839D  |
| 90  | Ktn1          | WISEKEKEITYLCNELESLK  | D986Y  |
| 91  | Mars          | SAICRYFFLLWGWEQDDLTN  | C73W   |
| 92  | Mmp10         | DPALSFDSVSMRGEVLFK    | T300M  |
| 93  | Mocs3         | LSRDEILRYSPQLLLPELGV  | R65P   |
| 94  | Notch2        | AELINCQADVSAVDDHGKSA  | A1969S |
| 95  | Pik3r5        | EEEELEMDRYCAERDSLLS   | H333Y  |
| 96  | Ptpn11        | TIQMVRSQRSVMVQTEAQYR  | G507V  |
| 97  | Rbm5          | TALSPYASLAINNIRLIKDK  | V259I  |
| 98  | Rhpn2         | VHFLDPHCSALLAGAKEGDY  | S548L  |
| 99  | Rrs1          | QAKKERVAKNVLNRLRLAR   | A194V  |
| 100 | Slc16a13      | FFIPYVHLVANLQDLGWDPL  | H240N  |
| 102 | Slc35b3       | NLTGVMLISLPLCADAVIGN  | A203P  |
| 104 | Syncrip       | ISVANNRLFVASIPKSKTKE  | G248A  |
| 105 | Tm7sf3        | YNFFETTIFTPANIGYARA   | A160T  |
| 106 | Ubqln1        | ASMFNTPGMQALLQQITENP  | G12A   |
| 107 | Vprbp         | PVSLPRTPRIGNGIASRLGS  | A905G  |
| 108 | Zbtb43        | MAHRRWIHVKPERLEQAWDG  | A248P  |
| 109 | 4933409G03Rik | GGDEDEDGDEYGGDGGDD    | D122Y  |
| 110 | Acsm2         | ASLTMHHLWKHPRLFTLWGN  | P32H   |
| 111 | Actr8         | ELWIYQREWQHFGVRMLRER  | R610H  |
| 112 | Ankrd11var2   | GHKSLCVNEVLSFYVPMVDV  | W2625L |
| 113 | Arhgap30      | HPVVPLVAPQSQTYAFETQT  | R1076S |
| 114 | Arvcf         | KRRVRQLRGLSLLVALLDHP  | P405S  |
| 115 | Baz2a         | SIFVSPTSPRLGESVLQDN   | G373R  |
| 116 | C2cd3         | TSPWSSFMSDLSEVLSPQPT  | M2073L |
| 117 | Ccdc113       | DIKITAAEFSKLRSRKSKA   | Q76K   |
| 118 | Ccdc67var2    | LKAQFSKLTSTFEKLRHLHQM | N106T  |
| 119 | Cpa4          | LLDNEDEEMQNNEGIERSGD  | H107N  |
| 120 | Csn3          | RSVLNFNQYERNYYHYRPSL  | P60R   |

|     |             |                       |         |
|-----|-------------|-----------------------|---------|
| 121 | Daglb       | TDLVPSDIAACFTLLHQQQD  | G238C   |
| 122 | Dip2bvar2   | SEGETVVNVLHFKKDAGLWH  | D324H   |
| 123 | Dip2b       | ERIASVLGDKAHLNAGDNVV  | G805A   |
| 124 | Emilin2var2 | AEPSQLPGIPCSKESGMKDI  | S258C   |
| 125 | Fam83c      | TLGHSKLDLIAKYHQLQGAR  | T710A   |
| 126 | Frmd6       | RGKDYILKHIQNMHKDQFAL  | P201Q   |
| 127 | Fxr2        | PQRRNRSRRRCNRGNRTDGS  | R594C   |
| 128 | Fzd9        | AMEIPMCRGIVYNLTRMPNL  | G52V    |
| 129 | Gm10564     | RAGRDVEPRARATRRDWEPR  | S154R   |
| 131 | Hdgfrp3     | QSRKSPGDEEDGKDCKEEENK | D167G   |
| 132 | Itpr3       | EEPGGKNVRRFIQGVGHMMS  | S916F   |
| 133 | Kcnj12var2  | DGKLCLMWRVANLRKSHIVE  | G216A   |
| 134 | Klh7        | ISKNFLSKTVLAEPLIQDNP  | Q248L   |
| 135 | Ktn1var3    | WISEKEKEITGLCNELESLK  | D986G   |
| 136 | Lonrf1      | YLEDVKIENGNEIRSLRELH  | D739N   |
| 137 | Lrfn1       | APTLTMLCAKMGLLFVPPAI  | T54M    |
| 138 | Lrrc66      | GMWQPQSPVELIDSQDEQVTD | R351I   |
| 139 | Lrrcc1var2  | QNMDDAFRRQGDEIVEAHQA  | V958G   |
| 140 | Lrrcc1      | QNMDDAFRRQMDEIVEAHQA  | V958M   |
| 141 | Mbtd1       | ITAIKKQNILYNPKEKADWF  | H12Y    |
| 142 | Mtap2       | YYKNGTVMAPGLPEMLDLAG  | D807G   |
| 143 | Mybbp1a     | MKYALKRLITALGVGREEAR  | G78A    |
| 145 | Otop1       | SQHQKMQCRFYGVLVGSLG   | D307Y   |
| 146 | Paip1var2   | RAPEQTKPQRDPPSSQDKIP  | A17D    |
| 147 | Pion        | LVLHLNSHCSSADFEVFHLM  | A675S   |
| 148 | Ppig        | KERDHETTKETEKPLDPKGK  | K499T   |
| 149 | Prdm16      | VSNSSQGATAPTGSEEKFDG  | A573P   |
| 150 | Prkcb       | DLTSRNDFMGFLSFGISELQ  | S258F   |
| 151 | Prkcc       | VPSLCGVDHTDRRGRLQLEI  | E156D   |
| 152 | Prrc2b      | MMPSYMDPRISPTRTPVDFY  | T703S   |
| 153 | Psd         | PSSSLGSGNENDEAGGEEDV  | D350N   |
| 154 | Psg28       | MEVSSELFSNVCTSWQRVLL  | G11V    |
| 156 | Rnf26       | FTFGGLQALGALLYSCYSGL  | T85A    |
| 157 | Rrs1var4    | QFARLKGIRPEKKTNLVWDE  | D134E   |
| 158 | Shank2      | KYETDLGKDRKADDKKNMLI  | R702K   |
| 159 | Slc27a3     | QGFLHFHDRTEDTFRWKGEN  | G529E   |
| 160 | Tatdn2      | EESHTKVSVENEASALDRSS  | K286N   |
| 161 | Thrap3var3  | GRGAFPRGRGWFMFRKSSTS  | R906W   |
| 162 | Thrap3var2  | HDKFSGEEGEMEDDESGTEN  | I930M   |
| 163 | Ttnv2       | GVGEPLESAPALMKNPFVLP  | E25599A |
| 164 | Usp28       | YNDISVTESSLEELERDSYG  | W631L   |

|     |               |                       |        |
|-----|---------------|-----------------------|--------|
| 165 | Wdfy3var2     | TELCHPPRHMAQKEQEELKLY | T43A   |
| 166 | Wnt3          | SCEVKTCWWAEPDFRAIGDF  | Q224E  |
| 167 | Zfp423var2    | LAHIHQAHANHKHKCPMCPE  | Q329H  |
| 168 | Zfp687        | LKTHFRTHGMPFIRARQGGG  | A1225P |
| 169 | Braf          | APPSDSTGPQTLTSPSPSKS  | I313T  |
| 170 | 9530053A07Rik | RVQAFRHGTDVIETKFGLL   | M938T  |
| 171 | Abcc6         | AFRAQASFTAETHDALMDENQ | Q1144  |
| 172 | Acsn2         | TFHMNIKKLIHIQWGHQEAP  | P32H   |
| 173 | Ap2a2         | AKTVFEALQAAACHENLVKV  | P489A  |
| 174 | Arfgef1       | CAVSMDELLSATHPRMFSLQ  | T1155  |
| 175 | Bsg           | MAAALLPLAFTLLSGQ      | A8P    |
| 176 | Ccdc67        | KCSQFQKQAQTYQTLNGKK   | N186T  |
| 177 | Cd63          | VKFLLYVLLLPFCACAVGLI  | A20P   |
| 178 | Chadl         | LEGNMLEELRAGTFGALGSL  | P150A  |
| 179 | Clasp1        | ALQSHLKNSDNIVSLPQSDR  | S545N  |
| 180 | Cog8          | SRVGADFRGQVAPVFQRVAI  | L373V  |
| 181 | Col17a1       | YSNVTQDLMDVFQTYGTIPG  | F1366  |
| 182 | Cpq           | AEITGSMYEQVVLVSGHLD   | E281Q  |
| 183 | Cspg4         | EGISVELEVLATVIPLDVQN  | P1360  |
| 184 | Cwc22         | AQQRTEYKFFALLAGRFCML  | G507A  |
| 185 | Dennd4a       | TALSGGRSDLVYNSLSKDNV  | G908V  |
| 186 | Dmbt1         | PTDQTTAEQTTVPDYTPIGT  | P448T  |
| 187 | Dnah11        | YNYTTPRSFLEQISLFSLL   | K3048  |
| 188 | Dnah5         | SDVTWFDKAVGSLVEEEFGE  | V2845  |
| 189 | Dnah6         | LYGEVNNVTLKWKDGLMALS  | E1806  |
| 190 | Edem3         | DIIFDIEDYIVTTEAHLPL   | F490V  |
| 191 | Eftud2        | LLRLVCKKFFCEFTGFVDMC  | G424C  |
| 192 | Glrx          | IQSGKVVFITPTCPYCRKT   | K20T   |
| 193 | Gm13154       | RLSFAQRTLYMDVMLENYNN  | I39M   |
| 194 | Gm7120        | LGIFCLVADRFLRFPIIQHN  | L59F   |
| 195 | Gsg2          | NLQHFHRTVLRFSATDLLC   | S739R  |
| 196 | Hebp1         | MGMTVPVSFAVFPNEDGSLQ  | L86V   |
| 197 | Hmcn1         | VHVSdTGRYVWVAVNVAGMT  | C2362  |
| 198 | Hydin         | AVSPAVHFSFSPHNFGTCFI  | T4349  |
| 199 | Igsf9         | AGVVGVCFLAVAVLVSILA   | G747A  |
| 200 | Il6st         | MSAPTIWLAQALLF        | R5T    |
| 201 | Kansl1        | ELRAELLGRQAVLEFSLENL  | P129A  |
| 202 | Lfn1          | MTSLVHLTSLNTIGQVAAG   | R98L   |
| 203 | Mcm8          | IPHQLLRKYIAYARQYVHPR  | G636A  |
| 204 | Megf11        | CKLPESSYVEIKSPVHLGSP  | M1017  |
| 205 | Mroh1         | QCFNTKVLGIMVETKDPALK  | K779M  |

|     |           |                       |       |
|-----|-----------|-----------------------|-------|
| 206 | Mtcl1     | VEQLQKEKSPLRSGSFLCSR  | R1272 |
| 207 | Mycbp2    | IRLDKVVPLKGNVKYAVRLR  | E1822 |
| 208 | Myh10     | SGAGKTENTKNVIQYLAHVA  | K190N |
| 209 | Myo7b     | DVNADTILHYQQELPKYLRG  | H1910 |
| 210 | Myo7b     | KVLKELVPQNVTRLMSSSEEW | L1962 |
| 211 | N4bp2     | PSTHPLHNSGFDLPGTDGDQ  | S222F |
| 212 | Ndufs6    | MAAALTFRRLLTL         | V4A   |
| 213 | Nfat5     | VQQHPSTPKRYTVLYISPPP  | H63Y  |
| 214 | Nxf3      | HKTLSACKEILFGSESIKTM  | F309L |
| 215 | Pcdhb13   | SATDSDSGSNGHITYSLLLP  | A482G |
| 216 | Phkb      | IGCLGTSKIYPILGKTVVCY  | R559P |
| 217 | Plekha7   | RLFPQLQTYVAYRPHPPQLR  | P841A |
| 218 | Pnpla7    | LSGWLLWKRCNPLATKVKV   | W1153 |
| 219 | Ppp2r3a   | SHRNSLDTNLISMLFQNLSE  | T1971 |
| 220 | Prkcb     | KEPHAVFYAAQIAIGLFFLQ  | E449Q |
| 221 | Rab11fip5 | PVPRPHNSISYTLSSQKVLG  | S992Y |
| 222 | Rimbp3    | KEMQGLQFQPVHPSETSETT  | G685V |
| 223 | Sall4     | GKVANTNVTLHALRGTKVAV  | Q179H |
| 224 | Samd9l    | IERYFSEVQDLNSFWHSGVV  | S1498 |
| 225 | Scn9a     | EFCKLSDFEATLDPPLLIK   | A1795 |
| 226 | Shroom2   | KVVNLLLSLSRRLARVENAL  | G1372 |
| 227 | Slco6d1   | QSVPTSWNSMRLGLMSTVWR  | S593R |
| 228 | Sys1      | VLNALTALGMLYFIRRGKQ   | L81M  |
| 229 | Tg        | TVCDNSSIQVWCLTAERLGV  | G1355 |
| 230 | Tg        | KVGTAWKQVYFLGVPYAAP   | R2226 |
| 231 | Tmem30c   | ANSIFNDTITISYNLNSSTQ  | L169I |
| 232 | Tmem44    | VPLTSLSHCKALRTMTAISR  | P325A |
| 233 | Trpv4     | TKKCPGVNSLLVDGSFQLLY  | F544L |
| 234 | Tspan15   | IYSTVFWLIGSLVLSVGIYA  | G36S  |
| 235 | Tsply3    | QADGAHLQLVLRFGMRRLH   | R151L |
| 236 | Ttc3      | PAFRTSLNFVQTERGFRKTK  | E390Q |
| 237 | Ttn       | IKIVRLTTGSAYQFRVCAEN  | E1901 |
| 238 | Tubg1     | EGFVLCHSIAWGTGSGGLGSY | G143W |
| 239 | Usp19     | VQQRQPQVPSISISKCAACQR | P829S |
| 240 | Usp51     | DAVVTKATMEQLLNSEGYLL  | E642Q |
| 241 | Vstm4     | NSSGETVTSVPSLAPLQPQK  | T231P |
| 242 | Wdr11     | PPLTTKNIKMSQPLLAVGTS  | Y483S |
| 243 | Zbtb16    | DLTKMGMIQLHNPSHPTGLL  | Q12H  |
| 244 | Zfp180    | KGRGQVLNHSMLVGGQQELL  | V220M |
| 245 | Zfp930    | ECGKGFAHYSNLRKHGSTHT  | T172N |



**Table S2: List of all Immunogenic Epitopes.**  
Gene names are shown. APL – altered peptide ligand

| Peptide Identifier | Mutant Gene | 20–mer Peptide Sequence | APL |
|--------------------|-------------|-------------------------|-----|
| 3                  | Olf1247     | SLKTHSQEGRCKALSTCSSH    |     |
| 11                 | Slc5a9      | WRRVCNINAITLLAINIFLW    |     |
| 14                 | Olf1549     | CADIRVNVWYVLSVLLSTVV    |     |
| 20                 | Myo1g       | LQGDVAFGHSNLFIRSPRTL    |     |
| 23                 | Ace         | ALEKIAFLPFAYLVDQWRWG    |     |
| 35                 | Musk        | WAYGVVLWEIVSYGLQPYYG    |     |
| 41                 | Slc17a6     | GYIASRLAANPVFGAAILLT    |     |
| 43                 | Ankrd11     | YAEYVTYTGSVLLDGKPLSK    | APL |
| 44                 | Glb1l2      | GSSAEESHLSCLNWSTLVPL    | APL |
| 48                 | Gm10717     | TFFSDFVIFQTFKWMFLIFL    |     |
| 51                 | Gm10715     | RSYSVHFSFFKFFSDFVIFQ    |     |
| 53                 | Zfp955b     | EDVAVNFSLGHWALLDSYQK    |     |
| 60                 | Ttc18       | ASEMHFIFLRSGHIYLEEKE    | APL |
| 66                 | Map2k5      | MLWLALGPFCGMENQVLVIR    | APL |
| 68                 | Olf1984     | FRTFPMKAVCVLYTMVTPM     |     |
| 74                 | Ampd1       | QRFDKFNDKYSPVGASELRD    |     |
| 75                 | Zfp541      | KMIQTKSVAQWVEYYYYIWKK   |     |
| 77                 | Rasa3       | TERIYSLFNLSMGKLEKMQE    | APL |
| 84                 | Clcn7       | ALGLRHLVVVGNHNQVVGLV    |     |
| 94                 | Notch2      | AELINCQADVSAVDDHGKSA    | APL |
| 133                | Kcnj12var2  | DGKLCLMWRVANLRKSHIVE    |     |
| 135                | Ktn1var3    | WISEKEKEITGLCNELESLK    |     |
| 156                | Rnf26       | FTFGGLQALGALLYSCYSGL    |     |
| 175                | Bsg         | MAAALLPLAFTLLSGQ        |     |
| 176                | Ccdc67      | KCSQFQKQAQTYQTQLNGKK    |     |
| 184                | Cwc22       | AQQRTEYKFFALLAGRFCML    |     |
| 197                | Hmcn1       | VHVS DTGRYVWVAVNVAGMT   |     |
| 201                | Kansl1      | ELRAELLGRQAVLEFSLENL    |     |
| 212                | Ndufs6      | MAAALTFRLLTL            |     |
| 218                | Pnpla7      | LSGWLLWKRCNPLATKVKV     |     |
| 219                | Ppp2r3a     | SHRNSLDTNLISMLFQNLSE    |     |
| 220                | Prkcb       | KEPHAVFYAAQIAIGLFFLQ    |     |
| 222                | Rimbp3      | KEMQGLQFQPVHPSETSETT    |     |
| 230                | Tg          | KVGTAWKQVYLFLGVPYAAP    |     |
| 231                | Tmem30c     | ANSIFNDTITISYNLNSSTQ    |     |
| 237                | Ttn         | IKIVRLTTGSAYQFRVCAEN    |     |
| 238                | Tubg1       | EGFVLCHSIAWGTGSGGLGSY   |     |
| 239                | Usp19       | VQQRPVPSISISKCAACQR     |     |

**Table S3: Minimal Epitopes of Immunogenic Peptides**

| Peptide Identifier | Protein: Mutation | Minimal Epitope | Predicted Affinity (nM) |
|--------------------|-------------------|-----------------|-------------------------|
| 20                 | Myo1g:p.K696N     | VAFGHSNL        | 7                       |
| 20                 | Myo1g:p.K696N     | VAFGHSNLF       | 10                      |
| 20                 | Myo1g:p.K696N     | VAFGHSNLFI      | 177                     |
| 23                 | Ace:p.G473A       | KIAFLPFAYL      | 387                     |
| 23                 | Ace:p.G473A       | IAFLPFAYLV      | 390                     |
| 44                 | Glb1l2:pG36C      | LSCLNWSTL       | 632                     |
| 44                 | Glb1l2:pG36C      | SCLNWSTLV       | 844                     |
| 66                 | Map2k5:p.A11G     | CGMENQVLV       | 380                     |
| 66                 | Map2k5:p.A11G     | LALGPFCGM       | 427                     |
| 66                 | Map2k5:p.A11G     | CGMENQVLVI      | 897                     |
| 77                 | Rasa3:p.T203S     | RIYSLFNL        | 20                      |
| 77                 | Rasa3:p.T203S     | RIYSLFNLSM      | 391                     |
| 77                 | Rasa3:p.T203S     | LSMGKLEKM       | 395                     |
| 77                 | Rasa3:p.T203S     | SLFNLSMGKL      | 564                     |
| 77                 | Rasa3:p.T203S     | FNLSMGKL        | 931                     |
| 77                 | Rasa3:p.T203S     | IYSLFNLSM       | 969                     |
| 84                 | Clcn7:p.D771G     | VVVGHNHNV       | 256                     |
| 175                | Bsg:p.A8P         | LPLAFTLL        | 425                     |
| 175                | Bsg:p.A8P         | LLPLAFTLL       | 643                     |
| 237                | Ttn:p.E19018A     | SAYQFRVC        | 31                      |
| 237                | Ttn:p.E19018A     | SAYQFRVCA       | 437                     |
| 237                | Ttn:p.E19018A     | SAYQFRVCAE      | 973                     |
| 239                | Usp19:p.P829S     | ISISKCAAC       | 862                     |

**Table S4: Peptide Sequences for PancVAX**

| Peptide Identifier | Gene    | 20-mer Peptide Sequence | Mutation |
|--------------------|---------|-------------------------|----------|
| 20                 | Myo1g   | LQGDVAFGHSNLFI RSPRTL   | K696N    |
| 23                 | Ace     | ALEKIAFLPFAYLVDQWRWG    | G473A    |
| 44                 | Glb1l2  | GSSAEESHLSCLNWSTLVPL    | G36C     |
| 66                 | Map2k5  | MLWLALGPF CGMENQVLVIR   | A11G     |
| 77                 | Rasa3   | TERIYSLFNLSMGKLEKMQE    | T203S    |
| 84                 | Clcn7   | ALGLRHLVVVG NHNQVVGLV   | D771G    |
| 94                 | Notch2  | AELINCQADVSAVDDHGKSA    | A1969S   |
| 175                | Bsg     | MAAALLLPLAFTLLSGQ       | A8P      |
| 218                | Pnpla7  | LSGWWLLWKRCNPLATKVKV    | W1153    |
| 219                | Ppp2r3a | SHRNSLDTNLISMLFQNLSE    | T197I    |
| 230                | Tg      | KVGTAWKQVYLFLGVPYAAP    | R2226    |
| 237                | Ttn     | IKIVRLTTGSAYQFRVCAEN    | E1901    |
